# Supplementary material for: Reward-Related Attentional Bias and Adolescent Substance Use: A Prognostic Relationship?
Source: PubMed Central journal article supplement (PMC4376386; doi:10.1371/journal.pone.0121058), 2015-03-27
Supplement: pone.0121058.s001.pdf [file pone.0121058.s001.pdf]

| Item | Substance     | Question                                                               | Response categories                                                                                    |
|------|---------------|------------------------------------------------------------------------|--------------------------------------------------------------------------------------------------------|
| 1    | Alcohol       | How many times did you drink alcohol in your lifetime?                 | 1-10 = 1 to 10 times, 11 = 11-19 times, 12 = 20-39 times, 13 = 40 times or more                        |
| 2    |               | How many times did you drink alcohol in the last twelve months?        | 1-10 = 1 to 10 times, 11 = 11-19 times, 12 = 20-39 times, 13 = 40 times or more                        |
| 3    |               | How many times did you drink alcohol in the last 4 weeks?              | 1-10 = 1 to 10 times, 11 = 11-19 times, 12 = 20-39 times, 13 = 40 times or more                        |
| 4    |               | At how many week days do you normally drink alcohol?                   | 0-3 = 0 to 3 days                                                                                      |
| 5    |               | How many glasses of alcohol do you normally drink at a week day?       | 0-6 = 0 to 6 glasses, 7 = 7-10 glasses, 8 = 11 or more glasses per day                                 |
| 6    |               | At how many weekend days do you normally drink alcohol?                | 0-3 = 0 to 3 days                                                                                      |
| 7    |               | How many glasses of alcohol do you normally drink at a weekend day?    | 0-6 = 0 to 6 glasses, 7 = 7-10 glasses, 8 = 11 or more glasses per day                                 |
| 8    | Tobacco       | Did you ever smoke, even if it was just one cigarette or a few drafts? | 0 = never, 1 = 1 or 2 times, 2 = not every day, 3 = I stopped, 4 = every day                           |
| 9    |               | How many cigarettes do you normally smoke at a smoking day?            | Continuous, 0 - $\infty$                                                                               |
| 10   |               | How many cigarettes did you smoke in the past four weeks?              | 0 = I never smoke, 1 = 0 cigs, 2 = less than 1, 3 = 1-5 cigs, 4 = 6-10 cigs, 5 = 11-20, 6 = 20 or more |
| 11   | Cannabis      | How many times did you use weed or hash in your lifetime?              | 1-10 = 1 to 10 times, 11 = 11-19 times, 12 = 20-39 times, 13 = 40 times or more                        |
| 12   |               | How many times did you use weed or hash in the last twelve months?     | 1-10 = 1 to 10 times, 11 = 11-19 times, 12 = 20-39 times, 13 = 40 times or more                        |
| 13   |               | How many times did you use weed or hash in the last four weeks?        | 1-10 = 1 to 10 times, 11 = 11-19 times, 12 = 20-39 times, 13 = 40 times or more                        |
| 14   | Illegal drugs | How many times did you use amphetamine?                                | 1-10 = 1 to 10 times, 11 = 11-19 times, 12 = 20-39 times, 13 = 40 times or more                        |
| 15   |               | How many times did you use cocaine?                                    | 1-10 = 1 to 10 times, 11 = 11-19 times, 12 = 20-39 times, 13 = 40 times or more                        |
| 16   |               | How many times did you use magic mushrooms?                            | 1-10 = 1 to 10 times, 11 = 11-19 times, 12 = 20-39 times, 13 = 40 times or more                        |

Note: Cronbach's alpha alcohol items: baseline = 0.87, follow-up = 0.86, Cronbach's alpha tobacco items: baseline = 0.92, follow-up = 0.93, Cronbach's alpha cannabis items: baseline = 0.92, follow-up = 0.89, Cronbach's alpha illegal drug items: baseline = 0.54, follow-up = 0.58. Cronbach's alpha alcohol, tobacco and cannabis items: baseline = 0.69, follow-up = 0.62.
